# Supplementary material
Source: PubMed Central journal article supplement (PMC2649394)
Supplement: pp.108.132985_2.pdf [file pp.108.132985_2.pdf]

**Supplemental Table S2: Primers for quantitative real-time RT-PCR**

| Locus     | Gene Name       | Forward Primer           | Reverse Primer           |
|-----------|-----------------|--------------------------|--------------------------|
| At1g74710 | ICS1            | GAATTTGCAGTCGGGATCAG     | AATTAATCGCCTGTAGAGATGTTG |
| At2g14610 | PR1             | GAAACTTAGCCTGGGGTAGC     | TTCATTAGTATGGCTTCTCGTTCA |
| At3g57260 | PR2             | GAGTGTGGAAAACGCAAAGAC    | GACTGTTCGATCTGGATGAAACA  |
| At3g52430 | PAD4            | GTTAAAGATCAAGGAAGGATTGGA | AGAGATTGGTTTCCGAGCAG     |
| At1g64280 | NPR1            | CGCTTTCTAAAACCGTGGAA     | GTCGTTTCTCAGCAGTGTCG     |
| At1g66960 | lupeol synthase | GGAGATTTTCCTCAACAGGAACTA | AGATCTGCGTGATGTATGAACG   |
| At5g44420 | PDF1.2          | CTCTTGTTCTCTTTGCTGCTTTC  | ATAGTTGCATGATCCATGTTTG   |
| At1g06160 | ERF             | TGAAGAGAAAACACTCCATGAGAA | ACTTTCTTGCGTCATAACAACACT |
| At4g37640 | ACA2            | TCTTCTGTCAGGTGTTTAACGAGA | ACGATCAAACGGGAATCG       |
| At2g01650 | PUX2            | ATGAGTTTGTGAGCTCTGCTTTG  | CGGTCTGAACCTGATGAGC      |
| At3g62250 | UBQ5            | GAAGACTTACACCAAGCCGAAG   | TTCTGGTAAACGTAGGTGAGTCC  |

Primers are shown 5' to 3'.
